# Supplementary material
Source: publisher figshare collection journal article supplement (https://acs.figshare.com/ndownloader/files/14879066)
Supplement: Supplementary file 1 [file 14879066]

# Supporting Information

## Modification of Electrical and Magnetic Properties of Fe<sub>3</sub>O<sub>4</sub> Epitaxial Thin Films by Nitrogen Substitution for Oxygen

Satoshi Fujiwara<sup>1</sup>, Yuji Kurauchi<sup>1</sup>, Yasushi Hirose<sup>1\*</sup>, Isao Harayama<sup>3,4</sup>, Daiichiro Sekiba<sup>3,4</sup>, and Tetsuya Hasegawa<sup>1,2</sup>

1 Department of Chemistry, School of Science, The University of Tokyo, 7-3-1 Hongo, Bunkyo-ku, Tokyo 113-0033, Japan

2 Kanagawa Academy of Science and Technology, 3-2-1 Sakado, Takatsu-ku, Kawasaki 213-0012, Japan

3 Graduate School of Pure and Applied Sciences, University of Tsukuba, 1-1-1 Tennodai, Tsukuba, Ibaraki 305-8573, Japan

4 Tandem Accelerator Complex, University of Tsukuba, 1-1-1 Tennodai, Tsukuba, Ibaraki 305-8577, Japan

\* hirose@chem.s.u-tokyo.ac.jp

### Contents

1. Change of  $T_N$  by nitrogen substitution
2. Physical properties of nitrogen rich Fe<sub>3</sub>O<sub>4-x</sub>N<sub>y</sub> thin films (y=0.6 and 0.8)
3. DOSs under epitaxial strain

## 1. Change of $T_N$ by nitrogen substitution

Figure S1 shows XRD patterns of a  $\text{Fe}_3\text{O}_{4-y}\text{N}_y$  film before and after annealing at 500 °C for 1 hour in an UHV chamber (base pressure  $<5 \times 10^{-8}$  Torr). Note that this annealing temperature (500 °C = 773 K) is lower than  $T_N$  of  $\text{Fe}_3\text{O}_4$  ( $\sim 860$  K). After the annealing, diffraction peaks from impurity phase(s) appeared due to intermixing between the  $\text{Fe}_3\text{O}_{4-y}\text{N}_y$  thin film and MgO substrate. According to the previous report on  $\text{Fe}_3\text{O}_4$  film on MgO, similar intermixing might start at much lower temperature of 300-450 °C.<sup>S1-S4</sup>

In order to avoid the intermixing between the  $\text{Fe}_3\text{O}_{4-y}\text{N}_y$  thin film and MgO substrate, we conducted  $M$ - $T$  measurements below room temperature. Although large uncertainty is included, extrapolation of the  $M$ - $T$  curves above 200 K (Fig. S2) suggested a tendency that nitrogen substitution reduced  $T_N$ .

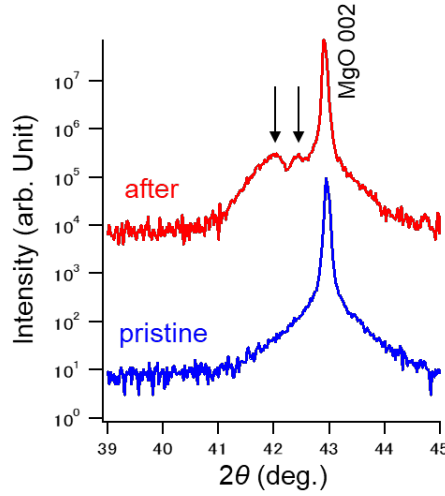

**Figure S1.** XRD patterns of a  $\text{Fe}_3\text{O}_{4-y}\text{N}_y$  thin film ( $y=0.56$ ) before and after the annealing. Arrows represent the diffraction from impurity phase(s).

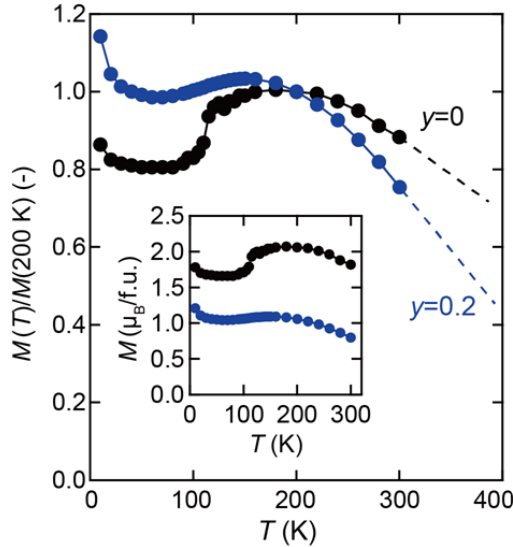

**Figure S2.** Normalized magnetization  $M(T)/M(200 \text{ K})$  vs temperature curves of  $\text{Fe}_3\text{O}_{4-y}\text{N}_y$  thin films ( $y=0, 0.2$ ) under field-cooled condition. A magnetic field of 1 kOe was applied along the in-plane direction. Dashed lines are visual guides for magnetization over 300 K. Inset shows the magnetization

without normalization.

## Reference

- <sup>S1</sup> Kim, Y. J.; Gao, Y.; Chambers, S. A. Selective Growth and Characterization of Pure, Epitaxial  $\alpha$ - $\text{Fe}_2\text{O}_3(0001)$  and  $\text{Fe}_3\text{O}_4(001)$  Films by Plasma-Assisted Molecular Beam Epitaxy. *Surf. Sci.* **1997**, *371*, 358.
- <sup>S2</sup> Anderson, J. F.; Kuhn, M.; Diebold, U.; Shaw, K.; Stoyanov, P.; Lind, D. Surface Structure and Morphology of Mg-Segregated Epitaxial  $\text{Fe}_3\text{O}_4(001)$  Thin Films on  $\text{MgO}(001)$ . *Phys. Rev. B* **1997**, *56*, 9902.
- <sup>S3</sup> Handke, B.; Haber, J.; Ślęzak, T.; Kubik, M.; Korecki, J. Magnesium Interdiffusion and Surface Oxidation in Magnetite Epitaxial Films Grown on  $\text{MgO}(100)$ . *Vacuum* **2001**, *63*, 331.
- <sup>S4</sup> N.T.H. Kim-Ngan, A.G. Balogh, J.D. Meyer, J. Brötz, S. Hummelt, M. Zając, T. Ślęzak, and J. Korecki, *Nucl. Instruments Methods Phys. Res. B* **2009**, *267*, 1484.

## 2. Physical properties of nitrogen rich $\text{Fe}_3\text{O}_{4-x}\text{N}_y$ thin films ( $y=0.6$ and $0.8$ )

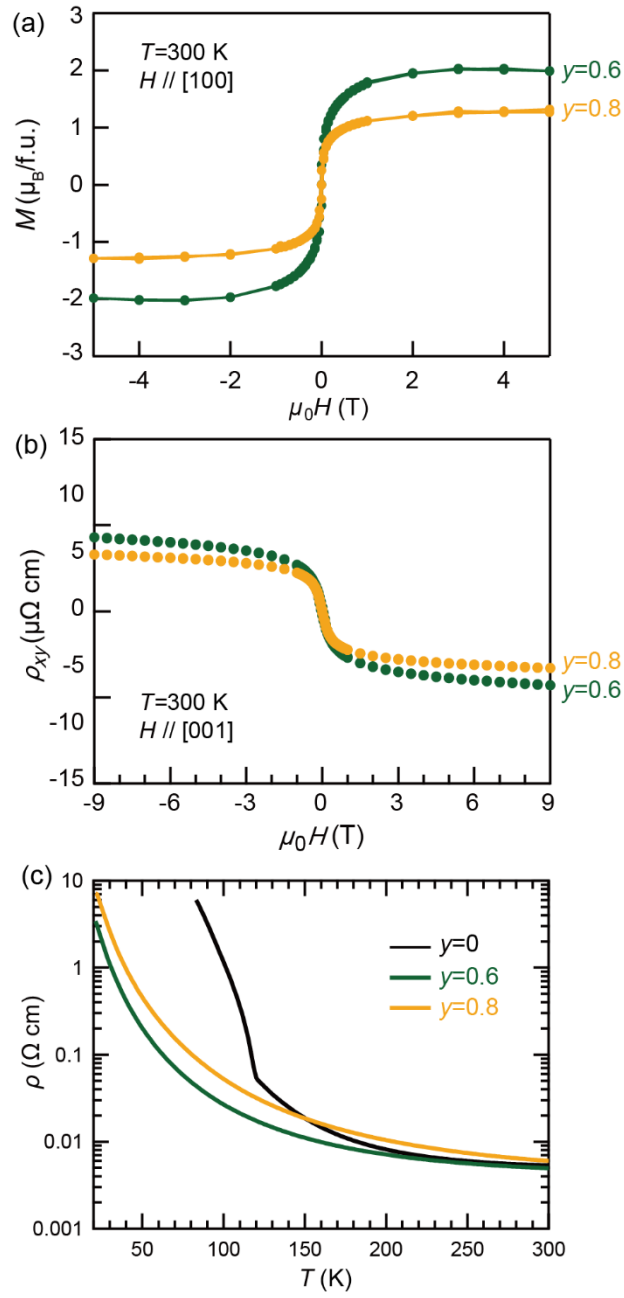

**Figure S3.** (a) In-plane magnetization vs magnetic field curves at room temperature (300 K), (b) Hall resistivity  $\rho_{xy}$  at 300 K, and (c)  $\rho$ - $T$  curves of the  $\text{Fe}_3\text{O}_{4-y}\text{N}_y$  thin films.

### 3. DOSs under epitaxial strain

The crystal and electronic band structures of  $\text{Fe}_3\text{O}_4$  and  $\text{Fe}_3\text{O}_{3.5}\text{N}_{0.5}$  under the epitaxial strain from MgO substrate were calculated by using constrained structural optimization procedures. Firstly, we calculated the lattice constant of MgO using the GGA-PBE functional. The obtained value 4.251 Å was about 1% larger than the experimental value of 4.210 Å. Next, we optimized the out-of-plane lattice constant and atomic positions of  $\text{Fe}_3\text{O}_4$  and  $\text{Fe}_3\text{O}_{3.5}\text{N}_{0.5}$ , where the in-plane lattice constant was fixed at that of MgO, as follows. We used the primitive cell ( $\text{Fe}_6\text{O}_8$  or  $\text{Fe}_6\text{O}_7\text{N}$ ) of which the lattice vector is:

$$(\mathbf{a} \ \mathbf{b} \ \mathbf{c}) = \frac{1}{2} \begin{pmatrix} 0 & a & a \\ a & 0 & a \\ c & c & 0 \end{pmatrix} \quad (1)$$

where  $a$  and  $c$  are the in-plane and out-of-plane lattice constants, respectively. In this constrained structure optimization,  $a$  was set to the double of MgO (8.502 Å), and  $c$  was optimized.

Table S1 compares the calculated  $c$  and lattice distortion ratio ( $c/a - 1$ ) with the experimental values. The experimentally observed distortion ratio, c.a.  $-0.5\%$ , was qualitatively reproduced by our calculations. Figures S4(c) and (d) in the main text show the density of states (DOS) profiles of strained  $\text{Fe}_3\text{O}_4$  and  $\text{Fe}_3\text{O}_{3.5}\text{N}_{0.5}$ . The whole profiles are almost the same as those obtained by the strain-free calculations (Figures S4(a) and (b)), indicating that the tensile strain does not have a significant effect on the electronic conduction of  $\text{Fe}_3\text{O}_{4-y}\text{N}_y$ .

**Table S1.** Experimental (Exp.) and calculated (DFT) out-of-plane lattice constant,  $c$ , and distortion ratio,  $c/a-1$ . In-plane lattice constant  $a$  was fixed to the double of MgO ( $a_{\text{Exp.}}=8.420$  Å and  $a_{\text{DFT}}=8.502$  Å).

|                                           | $c_{\text{Exp.}}$ (Å) | $c_{\text{Exp.}}/a_{\text{Exp.}}-1$ (%) | $c_{\text{DFT}}$ (Å) | $c_{\text{DFT}}/a_{\text{DFT}}-1$ (%) |
|-------------------------------------------|-----------------------|-----------------------------------------|----------------------|---------------------------------------|
| $\text{Fe}_3\text{O}_4$                   | 8.369                 | -0.61                                   | 8.456                | -0.54                                 |
| $\text{Fe}_3\text{O}_{3.5}\text{N}_{0.4}$ | 8.382                 | -0.45                                   |                      |                                       |
| $\text{Fe}_3\text{O}_{3.5}\text{N}_{0.5}$ |                       |                                         | 8.455                | -0.55                                 |

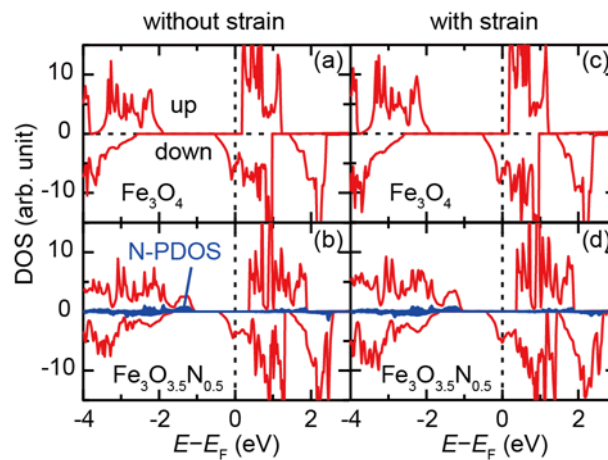

**Figure S4.** Spin-polarized electronic density of states (DOS) of (a, c)  $y = 0$  ( $\text{Fe}_3\text{O}_4$ ) and (b, d)  $y = 0.5$  ( $\text{Fe}_3\text{O}_{3.5}\text{N}_{0.5}$ ) (c, d) with and (a, b) without epitaxial strain. The blue lines in (b) and (d) correspond

to the partial DOS (PDOS) for nitrogen.
